# Supplementary material
Source: Springer Nature journal article supplement (https://www.springermedizin.de/resource/supplementary/12885_2014_4831_MOESM1_ESM.pdf/9467406)
Supplement: MOESM1 [file 9467406]

**IDENTIFIED** (GP-listed) patients aged 18 years or more with a first-time diagnosis of cancer recorded in the Danish National Patient Registry and a verified diagnosis in the Danish Cancer Registry as of 2011.

**N = 7,562**

No response from GP 1,981 (26.2%)

**RESPONDENTS:** Validated patients for whom the GP responded (% of validated patients).

**N = 5,581 (73.8%)**

|                                         |       |         |
|-----------------------------------------|-------|---------|
| <b>Exclusion (total)</b>                | 1,480 | (26.5%) |
| - No GP involvement in diagnosis        | 1,130 | (20.4%) |
| - National breast cancer screening case | 343   | (6.1%)  |
| - Male breast cancer patient            | 7     | (0.1%)  |

**STUDY POPULATION:** proportion of respondents with GP involvement in diagnostic and complete data.

**N =4,101 (73.5%)**

|                                         |     |        |
|-----------------------------------------|-----|--------|
| <b>Missing data (total)</b>             | 278 | (6.8%) |
| - Missing data - symptom interpretation | 146 | (3.6%) |
| - Missing data - CPP referral           | 7   | (0.2%) |
| - Missing data - diagnostic interval    | 125 | (3.0%) |

**STUDY SUBJECTS:** proportion of study population

**N =3,823 (93.2%)**
